# Supplementary material
Source: Royal Society of Chemistry journal article supplement (https://www.rsc.org/suppdata/p2/1999/1123/901158g.doc)
Supplement: Supplementary file 1 [file 901158g.doc]

**Supplemental Material - Paper no 9/01158G**

| Table 1. Bond length with AM1 methods. | | | | | | |
| --- | --- | --- | --- | --- | --- | --- |
| Structures | N3’-H | O-H | O-C2 | C2-C1 | C1-C2’ | C2'-N3' |
| 1 | 2.166 | 0.970 | 1.366 | 1.410 | 1.450 | 1.333 |
| 2 | 2.168 | 0.969 | 1.368 | 1.406 | 1.452 | 1.333 |
| 3 | 2.162 | 0.971 | 1.364 | 1.408 | 1.452 | 1.333 |
| 4 | 2.162 | 0.971 | 1.365 | 1.408 | 1.452 | 1.333 |
| 5 | 2.168 | 0.970 | 1.366 | 1.410 | 1.450 | 1.332 |
| 6 | 2.174 | 0.970 | 1.365 | 1.409 | 1.451 | 1.335 |
| 7 | 2.167 | 0.969 | 1.370 | 1.412 | 1.454 | 1.332 |
| 8 | 2.168 | 0.969 | 1.370 | 1.412 | 1.454 | 1.332 |
| 9 | 2.154 | 0.973 | 1.360 | 1.411 | 1.452 | 1.331 |
| 10 | 2.152 | 0.973 | 1.359 | 1.411 | 1.452 | 1.332 |
| 11 | 2.182 | 0.968 | 1.371 | 1.409 | 1.454 | 1.335 |
| 12 | 2.168 | 0.969 | 1.370 | 1.412 | 1.454 | 1.332 |
| 13 | 2.168 | 0.970 | 1.367 | 1.409 | 1.452 | 1.331 |
| Average | 2.166 | 0.970 | 1.366 | 1.410 | 1.452 | 1.333 |

| Table 2. Angle and Dihedral with AM1 methods. | | | | | | | |
| --- | --- | --- | --- | --- | --- | --- | --- |
| Structures | C2'N3'H | N3'HO | HOC2 | OC2C1 | C2C1C2' | C1C2'N3' | C2C1C2'N3' |
| 1 | 90.59 | 139.24 | 110.50 | 125.96 | 122.68 | 131.02 | 0 |
| 2 | 90.69 | 139.17 | 110.28 | 126.32 | 122.53 | 130.97 | 1.00 |
| 3 | 90.86 | 139.03 | 110.57 | 126.19 | 122.51 | 130.84 | 0 |
| 4 | 90.88 | 138.98 | 110.57 | 126.22 | 122.46 | 130.82 | 1.83 |
| 5 | 90.43 | 139.35 | 110.43 | 125.91 | 122.66 | 131.22 | 0.21 |
| 6 | 90.72 | 138.75 | 110.69 | 126.26 | 122.65 | 130.92 | 0.48 |
| 7 | 90.74 | 139.43 | 110.26 | 126.10 | 122.51 | 130.96 | 0 |
| 8 | 90.70 | 139.45 | 110.23 | 126.11 | 122.54 | 130.97 | 0 |
| 9 | 91.06 | 138.79 | 110.9 | 126.09 | 122.36 | 130.80 | 0.25 |
| 10 | 91.26 | 138.64 | 110.98 | 126.15 | 122.37 | 130.57 | 0.79 |
| 11 | 90.67 | 138.71 | 110.22 | 126.50 | 122.47 | 130.98 | 3.17 |
| 12 | 90.69 | 139.46 | 110.23 | 126.10 | 122.55 | 130.97 | 0.11 |
| 13 | 90.56 | 139.21 | 110.43 | 126.08 | 122.58 | 131.14 | 0 |
| Average | 90.78 | 139.05 | 110.51 | 126.16 | 122.52 | 130.92 | 0.70 |

| Table 3. Bond length with PM3 methods. | | | | | | |
| --- | --- | --- | --- | --- | --- | --- |
| Structures | N3’-H | O-H | O-C2 | C2-C1 | C1-C2’ | C2'-N3' |
| 1 | 1.848 | 0.967 | 1.353 | 1.414 | 1.450 | 1.338 |
| 2 | 1.851 | 0.966 | 1.356 | 1.412 | 1.452 | 1.338 |
| 3 | 1.842 | 0.968 | 1.351 | 1.414 | 1.452 | 1.337 |
| 4 | 1.841 | 0.968 | 1.350 | 1.415 | 1.452 | 1.337 |
| 5 | 1.848 | 0.967 | 1.354 | 1.414 | 1.451 | 1.337 |
| 6 | 1.853 | 0.966 | 1.352 | 1.413 | 1.450 | 1.341 |
| 7 | 1.852 | 0.966 | 1.360 | 1.416 | 1.456 | 1.336 |
| 8 | 1.852 | 0.966 | 1.360 | 1.415 | 1.456 | 1.336 |
| 9 | 1.831 | 0.970 | 1.344 | 1.416 | 1.454 | 1.336 |
| 10 | 1.832 | 0.970 | 1.344 | 1.416 | 1.453 | 1.337 |
| 11 | 1.860 | 0.965 | 1.358 | 1.413 | 1.453 | 1.340 |
| 12 |  |  |  |  |  |  |
| 13 | 1.847 | 0.967 | 1.354 | 1.413 | 1.453 | 1.336 |
| Average | 1.846 | 0.967 | 1.353 | 1.414 | 1.453 | 1.338 |

| Table 4. Angle and Dihedral with PM3 methods. | | | | | | | |
| --- | --- | --- | --- | --- | --- | --- | --- |
| Structures | C2'N3'H | N3'HO | HOC2 | OC2C1 | C2C1C2' | C1C2'N3' | C2C1C2'N3' |
| 1 | 96.12 | 145.38 | 108.88 | 124.24 | 119.50 | 125.87 | 0 |
| 2 | 96.09 | 145.41 | 108.71 | 124.41 | 119.45 | 125.92 | 0 |
| 3 | 96.42 | 145.12 | 109.11 | 124.29 | 119.36 | 125.70 | 0 |
| 4 | 96.47 | 145.10 | 109.14 | 124.28 | 119.34 | 125.66 | 0.43 |
| 5 | 96.06 | 145.45 | 108.83 | 124.22 | 119.48 | 125.95 | 0 |
| 6 | 96.20 | 144.97 | 109.09 | 124.42 | 119.52 | 125.80 | 0.11 |
| 7 | 96.14 | 145.60 | 108.65 | 124.30 | 119.34 | 125.98 | 0 |
| 8 | 96.11 | 145.63 | 108.62 | 124.29 | 119.38 | 125.97 | 0 |
| 9 | 96.21 | 144.71 | 109.44 | 124.42 | 119.10 | 125.42 | 0.18 |
| 10 | 96.97 | 144.62 | 109.50 | 124.45 | 119.11 | 125.35 | 0 |
| 11 | 96.04 | 145.23 | 108.77 | 124.52 | 119.47 | 125.96 | 0.42 |
| 12 |  |  |  |  |  |  |  |
| 13 | 96.20 | 145.33 | 108.87 | 124.30 | 119.43 | 125.87 | 0 |
| Average | 96.26 | 145.20 | 108.98 | 124.35 | 119.37 | 125.78 | 0.10 |

| 1 | | | | | | | | | | | | | | | | | | | | | |
| --- | --- | --- | --- | --- | --- | --- | --- | --- | --- | --- | --- | --- | --- | --- | --- | --- | --- | --- | --- | --- | --- |
|  | Experimental | |  | AM1/INDO | | |  | | PM3/INDO | | |  | | AM1/HAM | | |  | | PM3/HAM | |  |
|  | *E*/eV | Log *e* |  | *E*/eV | *f* |  | | *E*/eV | | *f* |  | | *E*/eV | | *f* |  | | *E*/eV | | *f* |  |
|  | 3.75 | 4.17 |  | 3.79 | 0.71 |  | | 3.83 | | 0.67 |  | | 3.36 | | 0.48 |  | | 3.38 | | 0.36 |  |
|  | 3.89 | 4.21 |  | 4.30 | 0.10 |  | | 4.36 | | 0.11 |  | | 3.60 | | 0.08 |  | | 3.68 | | 0.20 |  |
|  | 4.24 | 4.26 |  | 5.14 | 0.06 |  | | 5.29 | | 0.09 |  | | 3.90 | | 0.46 |  | | 4.02 | | 0.45 |  |
|  |  |  |  | 5.41 | 0.16 |  | | 5.46 | | 0.11 |  | | 5.14 | | 0.17 |  | | 4.94 | | 0.16 |  |
|  |  |  |  | 5.69 | 0.22 |  | | 5.74 | | 0.12 |  | | 5.23 | | 0.35 |  | | 5.16 | | 0.20 |  |
|  |  |  |  | 5.82 | 0.56 |  | | 5.83 | | 0.69 |  | | 5.48 | | 0.53 |  | | 5.42 | | 0.72 |  |
|  |  |  |  |  |  |  | |  | |  |  | | 5.84 | | 0.08 |  | | 5.69 | | 0.10 |  |
|  |  |  |  |  |  |  | |  | |  |  | | 6.00 | | 0.12 |  | | 5.78 | | 0.72 |  |
|  |  |  |  |  |  |  | |  | |  |  | | 6.09 | | 0.78 |  | | 6.11 | | 0.21 |  |

| 2 | | | | | | | | | | | | | | | |
| --- | --- | --- | --- | --- | --- | --- | --- | --- | --- | --- | --- | --- | --- | --- | --- |
|  | Experimental | |  | AM1/INDO | |  | PM3/INDO | |  | AM1/HAM | |  | PM3/HAM | |  |
|  | *E*/eV | log *e* |  | *E*/eV | *F* |  | *E*/eV | *F* |  | *E*/eV | *f* |  | *E*/eV | *f* |  |
|  | 3.37 | 3.49 |  | 3.66 | 0.54 |  | 3.68 | 0.49 |  | 2.86 | 0.27 |  | 2.89 | 0.27 |  |
|  | 3.90 | 2.89 |  | 4.00 | 0.19 |  | 4.09 | 0.21 |  | 3.54 | 0.32 |  | 3.64 | 0.36 |  |
|  | 4.05 | 3.75 |  | 4.30 | 0.10 |  | 4.35 | 0.10 |  | 3.83 | 0.28 |  | 3.92 | 0.30 |  |
|  | 4.10 | 3.69 |  | 4.92 | 0.16 |  | 4.99 | 0.19 |  | 4.09 | 0.26 |  | 4.64 | 0.14 |  |
|  | 4.23 | 3.88 |  | 5.16 | 0.15 |  | 5.19 | 0.13 |  | 4.72 | 0.20 |  | 5.09 | 0.58 |  |
|  | 5.73 | 2.93 |  | 5.52 | 0.34 |  | 5.59 | 0.28 |  | 4.86 | 0.23 |  | 5.64 | 0.22 |  |
|  |  |  |  | 5.73 | 0.67 |  | 5.78 | 0.66 |  | 4.90 | 0.11 |  | 5.79 | 0.25 |  |
|  |  |  |  |  |  |  |  |  |  | 4.98 | 0.16 |  | 5.91 | 0.13 |  |
|  |  |  |  |  |  |  |  |  |  | 5.61 | 0.30 |  |  |  |  |
|  |  |  |  |  |  |  |  |  |  | 5.79 | 0.31 |  |  |  |  |
|  |  |  |  |  |  |  |  |  |  | 5.84 | 0.15 |  |  |  |  |

| 3 | | | | | | | | | | | | | | | |
| --- | --- | --- | --- | --- | --- | --- | --- | --- | --- | --- | --- | --- | --- | --- | --- |
|  | Experimental | |  | AM1/INDO | |  | PM3/INDO | |  | AM1/HAM | |  | PM3/HAM | |  |
|  | *E*/eV | Log *e* |  | *E*/eV | *f* |  | *E*/eV | *f* |  | *E*/eV | *f* |  | *E*/eV | *f* |  |
|  | 3.56 | 4.05 |  | 3.69 | 0.58 |  | 3.71 | 0.53 |  |  |  |  |  |  |  |
|  | 4.10 | 4.24 |  | 3.90 | 0.12 |  | 4.08 | 0.20 |  |  |  |  |  |  |  |
|  | 4.32 | 4.51 |  | 3.99 | 0.15 |  | 4.35 | 0.09 |  |  |  |  |  |  |  |
|  | 4.51 | 4.45 |  | 4.29 | 0.09 |  | 4.59 | 0.01 |  |  |  |  |  |  |  |
|  | 5.34 | 4.31 |  | 4.80 | 0.50 |  | 4.82 | 0.63 |  |  |  |  |  |  |  |
|  |  |  |  | 5.14 | 0.19 |  | 5.18 | 0.14 |  |  |  |  |  |  |  |

| 4 | | | | | | | | | | | | | | | | | | | | | |
| --- | --- | --- | --- | --- | --- | --- | --- | --- | --- | --- | --- | --- | --- | --- | --- | --- | --- | --- | --- | --- | --- |
|  | Experimental | |  | AM1/INDO | |  | | PM3/INDO | | |  | | AM1/HAM | | |  | | PM3/HAM | | |  |
|  | *E*/eV | Log *e* |  | *E*/eV | *f* | |  | | *E*/eV | *f* | |  | | *E*/eV | *f* | |  | | *E*/eV | *F* |  |
|  | 3.68 | 4.07 |  | 3.71 | 0.66 | |  | | 3.77 | 0.61 | |  | |  |  | |  | |  |  |  |
|  | 4.61 | 4.38 |  | 4.30 | 0.10 | |  | | 4.36 | 0.10 | |  | |  |  | |  | |  |  |  |
|  |  |  |  | 4.54 | 0.61 | |  | | 4.68 | 0.52 | |  | |  |  | |  | |  |  |  |
|  |  |  |  | 5.15 | 0.10 | |  | | 5.20 | 0.14 | |  | |  |  | |  | |  |  |  |

| 5 | | | | | | | | | | | | | | | |
| --- | --- | --- | --- | --- | --- | --- | --- | --- | --- | --- | --- | --- | --- | --- | --- |
|  | Experimental | |  | AM1/INDO | |  | PM3/INDO | |  | AM1/HAM | |  | PM3/HAM | |  |
|  | *E*/eV | log *e* |  | *E*/eV | *f* |  | *E*/eV | *f* |  | *E*/eV | *f* |  | *E*/eV | *F* |  |
|  |  |  |  | 3.57 | 0.79 |  | 3.68 | 0.76 |  | 2.90 | 0.82 |  | 2.99 | 0.73 |  |
|  |  |  |  | 4.96 | 0.10 |  | 5.33 | 0.10 |  | 4.30 | 0.15 |  | 3.58 | 0.13 |  |
|  |  |  |  | 5.24 | 0.10 |  | 5.62 | 0.23 |  | 4.73 | 0.33 |  | 4.18 | 0.13 |  |
|  |  |  |  | 5.53 | 0.29 |  | 5.72 | 0.38 |  | 5.09 | 0.47 |  | 4.86 | 0.41 |  |
|  |  |  |  | 5.66 | 0.18 |  |  |  |  | 5.37 | 0.12 |  | 5.00 | 0.30 |  |
|  |  |  |  |  |  |  |  |  |  | 5.56 | 0.18 |  | 5.14 | 0.16 |  |
|  |  |  |  |  |  |  |  |  |  | 5.78 | 0.26 |  | 5.45 | 0.19 |  |
|  |  |  |  |  |  |  |  |  |  | 5.78 | 0.23 |  | 5.55 | 0.40 |  |
|  |  |  |  |  |  |  |  |  |  |  |  |  | 5.61 | 0.11 |  |
|  |  |  |  |  |  |  |  |  |  |  |  |  | 5.92 | 0.11 |  |

| 6 | | | | | | | | | | | | | | | | | |
| --- | --- | --- | --- | --- | --- | --- | --- | --- | --- | --- | --- | --- | --- | --- | --- | --- | --- |
|  | Experimental | | | |  | AM1/INDO | |  | PM3/INDO | |  | AM1/HAM | |  | PM3/HAM | |  |
|  | *E*/eV | log *e* |  | *E*/eV | | | *f* |  | *E*/eV | *f* |  | *E*/eV | *f* |  | *E*/eV | *f* |  |
|  |  |  |  | 3.57 | | | 1.03 |  | 3.61 | 0.96 |  | 2.77 | 0.40 |  | 2.63 | 0.37 |  |
|  |  |  |  | 4.08 | | | 0.06 |  | 4.11 | 0.04 |  | 3.15 | 0.67 |  | 3.12 | 0.79 |  |
|  |  |  |  | 4.34 | | | 0.21 |  | 4.40 | 0.22 |  | 3.51 | 0.40 |  | 3.56 | 0.18 |  |
|  |  |  |  |  | | |  |  |  |  |  | 4.81 | 0.14 |  | 4.38 | 0.11 |  |
|  |  |  |  |  | | |  |  |  |  |  | 5.08 | 0.25 |  | 4.50 | 0.13 |  |
|  |  |  |  |  | | |  |  |  |  |  |  |  |  |  |  |  |

| 7 | | | | | | | | | | | | | | | |
| --- | --- | --- | --- | --- | --- | --- | --- | --- | --- | --- | --- | --- | --- | --- | --- |
|  | Experimental | |  | AM1/INDO | |  | PM3/INDO | |  | AM1/HAM | |  | PM3/HAM | |  |
|  | *E*/eV | log *e* |  | *E*/eV | *f* |  | *E*/eV | *f* |  | *E*/eV | *f* |  | *E*/eV | *f* |  |
|  | 3.21 | 4.00 |  | 3.52 | 0.69 |  | 3.51 | 0.53 |  | 2.79 | 0.26 |  | 2.77 | 0.28 |  |
|  | 3.67 | 3.57 |  | 3.82 | 0.2 |  | 3.92 | 0.37 |  | 3.06 | 0.33 |  | 3.17 | 0.45 |  |
|  | 3.91 | 4.22 |  | 4.24 | 0.08 |  | 4.31 | 0.07 |  | 3.34 | 0.61 |  | 3.46 | 0.48 |  |
|  | 4.12 | 4.36 |  | 5.12 | 0.14 |  | 5.12 | 0.14 |  | 4.39 | 0.14 |  | 4.43 | 0.10 |  |

| 8 | | | | | | | | | | | | | | | | |
| --- | --- | --- | --- | --- | --- | --- | --- | --- | --- | --- | --- | --- | --- | --- | --- | --- |
|  | Experimental | |  | AM1/INDO | |  | | PM3/INDO | |  | AM1/HAM | |  | PM3/HAM | |  |
|  | *E*/eV | log *e* |  | *E*/eV | *f* |  | *E*/eV | | *f* |  | *E*/eV | *f* |  | *E*/eV | *f* |  |
|  | 3.23 | 3.91 |  | 3.53 | 0.69 |  | 3.52 | | 0.52 |  | 2.78 | 0.25 |  | 2.77 | 0.29 |  |
|  | 3.84 | 4.11 |  | 3.84 | 0.20 |  | 3.94 | | 0.37 |  | 3.08 | 0.35 |  | 3.20 | 0.48 |  |
|  | 4.02 | 4.26 |  | 4.25 | 0.08 |  | 4.32 | | 0.07 |  | 3.38 | 0.61 |  | 3.49 | 0.46 |  |
|  |  |  |  | 4.79 | 0.01 |  | 4.50 | | 0.01 |  | 4.19 | 0.08 |  | 3.88 | 0.04 |  |

| 9 | | | | | | | | | | | | | | | | | | | |
| --- | --- | --- | --- | --- | --- | --- | --- | --- | --- | --- | --- | --- | --- | --- | --- | --- | --- | --- | --- |
|  | Experimental | |  | AM1/INDO | |  | PM3/INDO | |  | | AM1/HAM | | |  | | PM3/HAM | | |  |
|  | *E*/eV | Log *e* |  | *E*/eV | *f* |  | *E*/eV | *f* | |  | | *E*/eV | *f* | |  | | *E*/eV | *f* |  |
|  | - | - |  | 3.35 | 0.72 |  | 3.55 | 0.73 | |  | | 2.05 | 0.60 | |  | | 2.25 | 0.58 |  |
|  | - | - |  | 4.23 | 0.15 |  | 4.29 | 0.18 | |  | | 3.99 | 0.12 | |  | | 3.10 | 0.12 |  |
|  | - | - |  | 4.58 | 0.14 |  | 4.65 | 0.11 | |  | | 4.23 | 0.10 | |  | | 3.66 | 0.12 |  |
|  | - | - |  | 4.87 | 0.09 |  | 5.00 | 0.04 | |  | | 4.25 | 0.10 | |  | | 4.11 | 0.19 |  |

| 10 | | | | | | | | | | | | | | | |
| --- | --- | --- | --- | --- | --- | --- | --- | --- | --- | --- | --- | --- | --- | --- | --- |
|  | Experimental | |  | AM1/INDO | |  | PM3/INDO | |  | AM1/HAM | |  | PM3/HAM | |  |
|  | *E*/eV | Log *e* |  | *E*/eV | *f* |  | *E*/eV | *f* |  | *E*/eV | *f* |  | *E*/eV | *F* |  |
|  |  |  |  | 3.68 | 0.68 |  | 3.78 | 0.64 |  | 2.72 | 0.45 |  | 2.86 | 0.48 |  |
|  |  |  |  | 4.32 | 0.34 |  | 4.38 | 0.32 |  | 2.95 | 0.29 |  | 3.14 | 0.16 |  |
|  |  |  |  |  |  |  |  |  |  | 3.67 | 0.37 |  | 3.42 | 0.10 |  |
|  |  |  |  |  |  |  |  |  |  | 4.88 | 0.12 |  | 3.71 | 0.39 |  |
|  |  |  |  |  |  |  |  |  |  | 5.04 | 0.22 |  | 5.11 | 0.24 |  |
|  |  |  |  |  |  |  |  |  |  |  |  |  |  |  |  |

| 11 | | | | | | | | | | | | | | | |
| --- | --- | --- | --- | --- | --- | --- | --- | --- | --- | --- | --- | --- | --- | --- | --- |
|  | Experimental | |  | AM1/INDO | |  | PM3/INDO | |  | AM1/HAM | |  | PM3/HAM | |  |
|  | *E*/eV | Log *e* |  | *E*/eV | *f* |  | *E*/eV | *f* |  | *E*/eV | *f* |  | *E*/eV | *F* |  |
|  |  |  |  | 3.30 | 0.51 |  | 3.34 | 0.48 |  | 1.86 | 0.21 |  | 1.82 | 0.19 |  |
|  |  |  |  | 3.68 | 0.21 |  | 3.62 | 0.18 |  | 2.94 | 0.15 |  | 2.64 | 0.20 |  |
|  |  |  |  | 3.74 | 0.32 |  | 3.81 | 0.36 |  | 3.20 | 0.62 |  | 3.27 | 0.68 |  |
|  |  |  |  | 4.36 | 0.16 |  | 4.38 | 0.18 |  | 3.34 | 0.28 |  | 3.41 | 0.11 |  |
|  |  |  |  | 4.78 | 0.15 |  | 4.88 | 0.18 |  | 3.62 | 0.10 |  | 3.78 | 0.10 |  |
|  |  |  |  |  |  |  |  |  |  | 3.76 | 0.12 |  | 4.42 | 0.19 |  |
|  |  |  |  |  |  |  |  |  |  | 4.35 | 0.11 |  | 4.66 | 0.11 |  |
|  |  |  |  |  |  |  |  |  |  |  |  |  |  |  |  |
|  |  |  |  |  |  |  |  |  |  |  |  |  |  |  |  |

| 12 | | | | | | | | | | | | | | | | |
| --- | --- | --- | --- | --- | --- | --- | --- | --- | --- | --- | --- | --- | --- | --- | --- | --- |
|  | Experimental | | |  | AM1/INDO | |  | PM3/INDO | |  | AM1/HAM | |  | PM3/HAM | |  |
|  | | *E*/eV | log *e* |  | *E*/eV | *f* |  | *E*/eV | *f* |  | *E*/eV | *f* |  | *E*/eV | *F* |  |
|  | |  |  |  | 3.54 | 0.68 |  | 3.52 | 0.52 |  | 2.80 | 0.26 |  | 2.78 | 0.29 |  |
|  | |  |  |  | 3.84 | 0.20 |  | 3.94 | 0.37 |  | 3.10 | 0.34 |  | 3.22 | 0.48 |  |
|  | |  |  |  | 5.13 | 0.14 |  | 5.13 | 0.14 |  | 3.40 | 0.63 |  | 3.51 | 0.56 |  |
|  | |  |  |  | 5.54 | 0.25 |  | 5.41 | 0.10 |  | 4.62 | 0.15 |  | 5.10 | 0.10 |  |
|  | |  |  |  |  |  |  | 5.61 | 0.38 |  | 5.03 | 0.18 |  | 5.41 | 0.36 |  |
|  | |  |  |  |  |  |  |  |  |  | 5.35 | 0.39 |  |  |  |  |

| 13 | | | | | | | | | | | | | | | | | |
| --- | --- | --- | --- | --- | --- | --- | --- | --- | --- | --- | --- | --- | --- | --- | --- | --- | --- |
|  | Experimental | |  | AM1/INDO | |  | PM3/INDO | |  | AM1/HAM | | | |  | PM3/HAM | |  |
|  | *E*/eV | log *e* |  | *E*/eV | *f* |  | *E*/eV | *f* |  | *E*/eV | *f* |  | *E*/eV | | | *f* |  |
|  | - | - |  | 3.36 | 0.88 |  | 3.54 | 0.82 |  | 2.35 | 0.84 |  | 2.54 | | | 0.78 |  |
|  | - | - |  | 3.99 | 0.03 |  | 4.06 | 0.04 |  | 3.98 | 0.20 |  | 4.13 | | | 0.18 |  |
|  | - | - |  | 4.03 | 0.01 |  | 4.12 | 0.03 |  | 4.26 | 0.24 |  | 4.36 | | | 0.11 |  |
|  | - | - |  | 4.76 | 0.07 |  | 4.94 | 0.04 |  | 4.50 | 0.15 |  | 4.66 | | | 0.28 |  |
|  | - | - |  | 4.80 | 0.01 |  | 5.07 | 0.10 |  | 5.16 | 0.65 |  | 5.23 | | | 0.46 |  |
|  | - | - |  | 4.98 | 0.19 |  |  |  |  |  |  |  | 5.27 | | | 0.13 |  |
|  | - | - |  | 5.00 | 0.10 |  |  |  |  |  |  |  |  | | |  |  |
